# Supplementary material
Source: publisher figshare collection journal article supplement (https://acs.figshare.com/ndownloader/files/3970132)

*Supplementary Material for:*  
Comparing counterpoise-corrected,  
uncorrected, and averaged binding energies  
in benchmarking noncovalent interactions

Lori A. Burns, Michael S. Marshall, and C. David Sherrill

# Electronic Energies

- Interaction energies are derived from electronic energy terms stored in file `electronic_energies.tar`. Each file therein contains bimolecular complex and monomer energies for certain bimolecular complexes and computation types, which can be decoded through the README file, reproduced below.

## FILE LABEL GUIDES

-----

|                 |                                                                                |
|-----------------|--------------------------------------------------------------------------------|
| A24             | A24 database, used in Figs. 2--6                                               |
| MISC            | extra systems discussed in text, plotted in SI                                 |
| NCCN2_PD        | is the parallel displaced orientation of cyanogen dimer                        |
| NBC1-BzBz_S-3.9 | is the sandwich orientation of benzene dimer at equilibrium (3.9 Å) separation |
| S22-3           | is formic acid dimer                                                           |
| S22             | is the S22 database, used in Figs. 5 & 6                                       |
| CCSDTcor1       | CCSD(T) correlation energies                                                   |
| MP2cor1         | MP2 correlation energies                                                       |
| SCFtot          | HF total energies                                                              |
| DFMP2cor1       | DF-MP2 correlation energies                                                    |
| DFSCFtot        | DF-HF total energies                                                           |
| CP              | counterpoise-corrected monomers                                                |
| unCP            | non-counterpoise-corrected monomers                                            |
| aXz             | aug-cc-pVXZ basis set, X = d, t, q, 5, 6                                       |

# Example Figure for Basis Set Convergence of IE

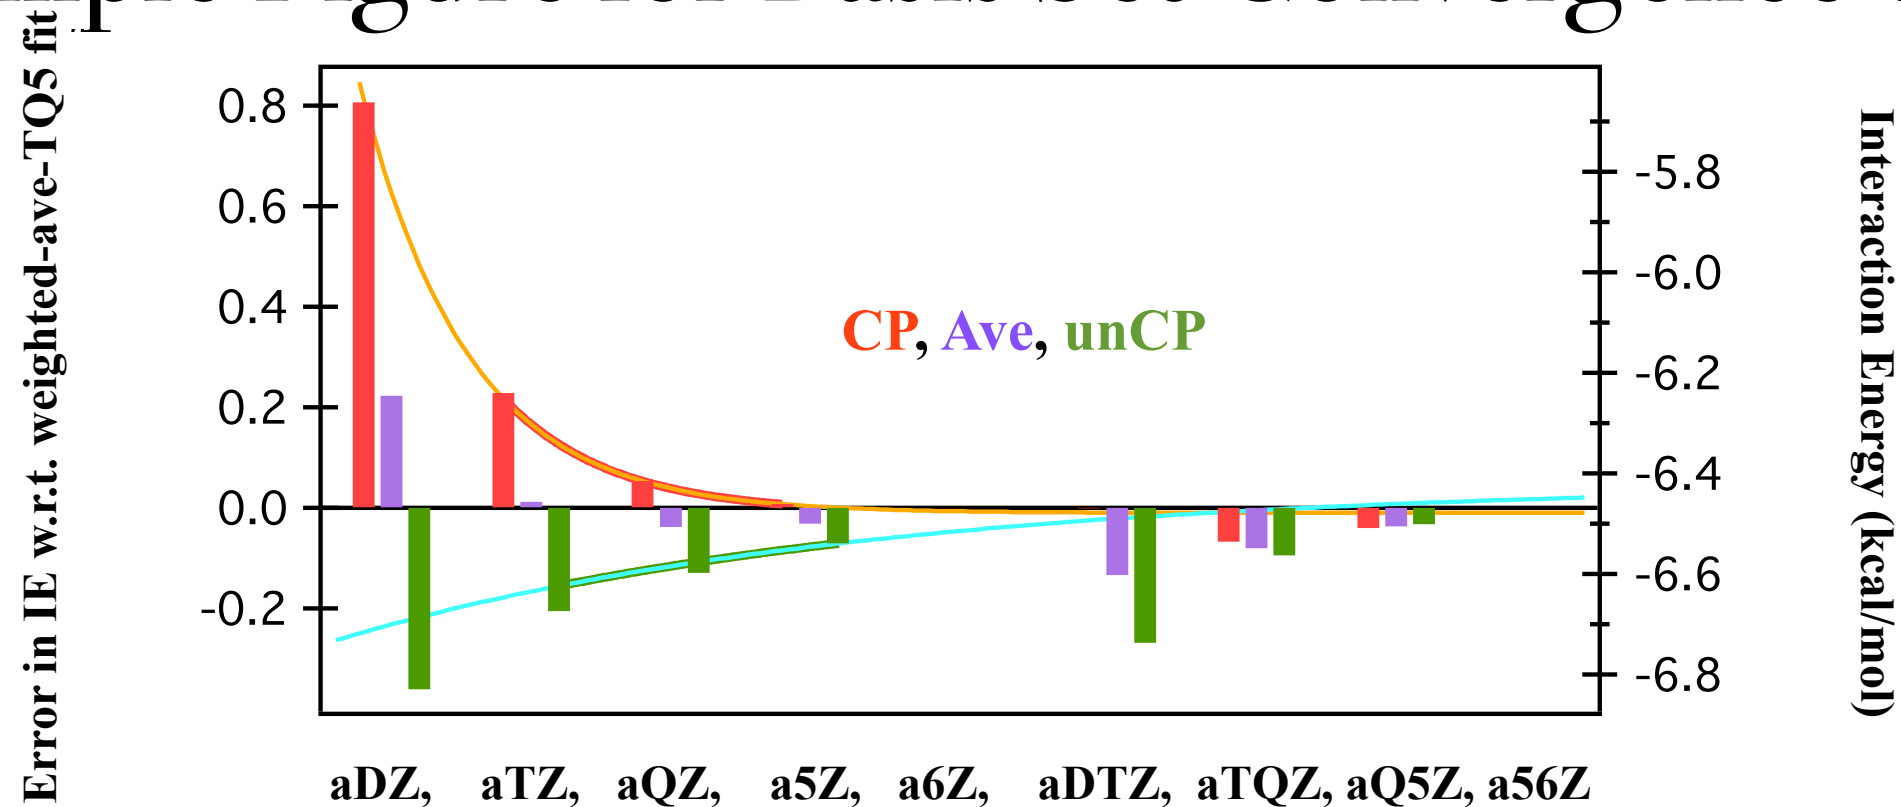

- Figures such as these are presented on the next pages for CCSD(T) interaction energies (IE), MP2 IE, and delta CCSD(T) terms for misc. systems (formic acid dimer, cyanogen dimer, and benzene dimer) and for the A24 database.
- In a plot such as this, CP (red), Ave (purple), and unCP (green) IE for a given basis set are plotted adjacent to one another. Read off the right axis for the IE value. Read off the left axis for the error in IE w.r.t. the reference. Usually, the reference is a (CP/unCP) weighted average of the CBS limit as obtained by fitting (orange and turquoise traces) the three highest aXZ basis sets to an exponential function (see text for details of procedure and following slide for actual values for A24).
- Basis sets run along the bottom axis: aDZ–a6Z, then aDTZ–a56Z. The latter use the SCF of the larger basis.
- Some figures may look outright wrong, such as the above plot where the unCP IE value for MP2/aDTZ looks wrong as an extrapolation of aDZ and aTZ values. Here, the aDZ is atop a HF/aDZ SCF and so displays a weaker IE than atop the HF/aTZ reference employed in the aDTZ extrapolation procedure.
- Magnitude of BSSE is span between the extremes of the red and green bars.

# A24 Reference IE

$$E_{X,CP}^{corl} = E_{CBS,CP}^{corl} + Ae^{-\alpha_{CP}X}; X = TQ5^{*} \text{ or } Q56^{*}$$

$$E_{X,unCP}^{corl} = E_{CBS,unCP}^{corl} + Ae^{-\alpha_{unCP}X}; X = TQ5^{*} \text{ or } Q56^{*}$$

$$E_{Ref} = \left( \left( E_{CBS,CP}^{corl} + E_{SCF/aXZ,CP} \right) \cdot \alpha_{CP} + \left( E_{CBS,unCP}^{corl} + E_{SCF/aXZ,unCP} \right) \cdot \alpha_{unCP} \right) / (\alpha_{CP} + \alpha_{unCP}); X = 5^{*} \text{ or } 6^{*}$$

|          |        |          |        |
|----------|--------|----------|--------|
| * A24-1  | -6.502 | * A24-13 | -1.376 |
| * A24-2  | -5.007 | * A24-14 | -1.088 |
| * A24-3  | -4.758 | * A24-15 | -0.505 |
| * A24-4  | -4.569 | * A24-16 | -1.484 |
| * A24-5  | -3.141 | * A24-17 | -0.831 |
| * A24-6  | -1.633 | * A24-18 | -0.610 |
| * A24-7  | -0.761 | * A24-19 | -0.534 |
| * A24-8  | -0.669 | * A24-20 | -0.397 |
| * A24-9  | -4.520 | * A24-21 | -0.347 |
| * A24-10 | -2.560 | * A24-22 | 0.835  |
| * A24-11 | -1.618 | * A24-23 | 0.945  |
| * A24-12 | -1.520 | * A24-24 | 1.131  |

To obtain an unbiased reference, CP and unCP IE basis set series are independently fitted to an exponential form with the highest three zeta basis sets available (TQ5 or Q56), noting both the extrapolated IE limit and the decay rate toward that limit ( $E_{CBS}$  and  $\alpha$ ). The final reference IE is the weighted average of the former with weights supplied by the latter.

Error in IE w.r.t. Ref (CP/unCP-weighted-ave of 3-basis fit)

# Basis Convergence of CCSD(T)/aXZ for A24

CP, Ave, unCP

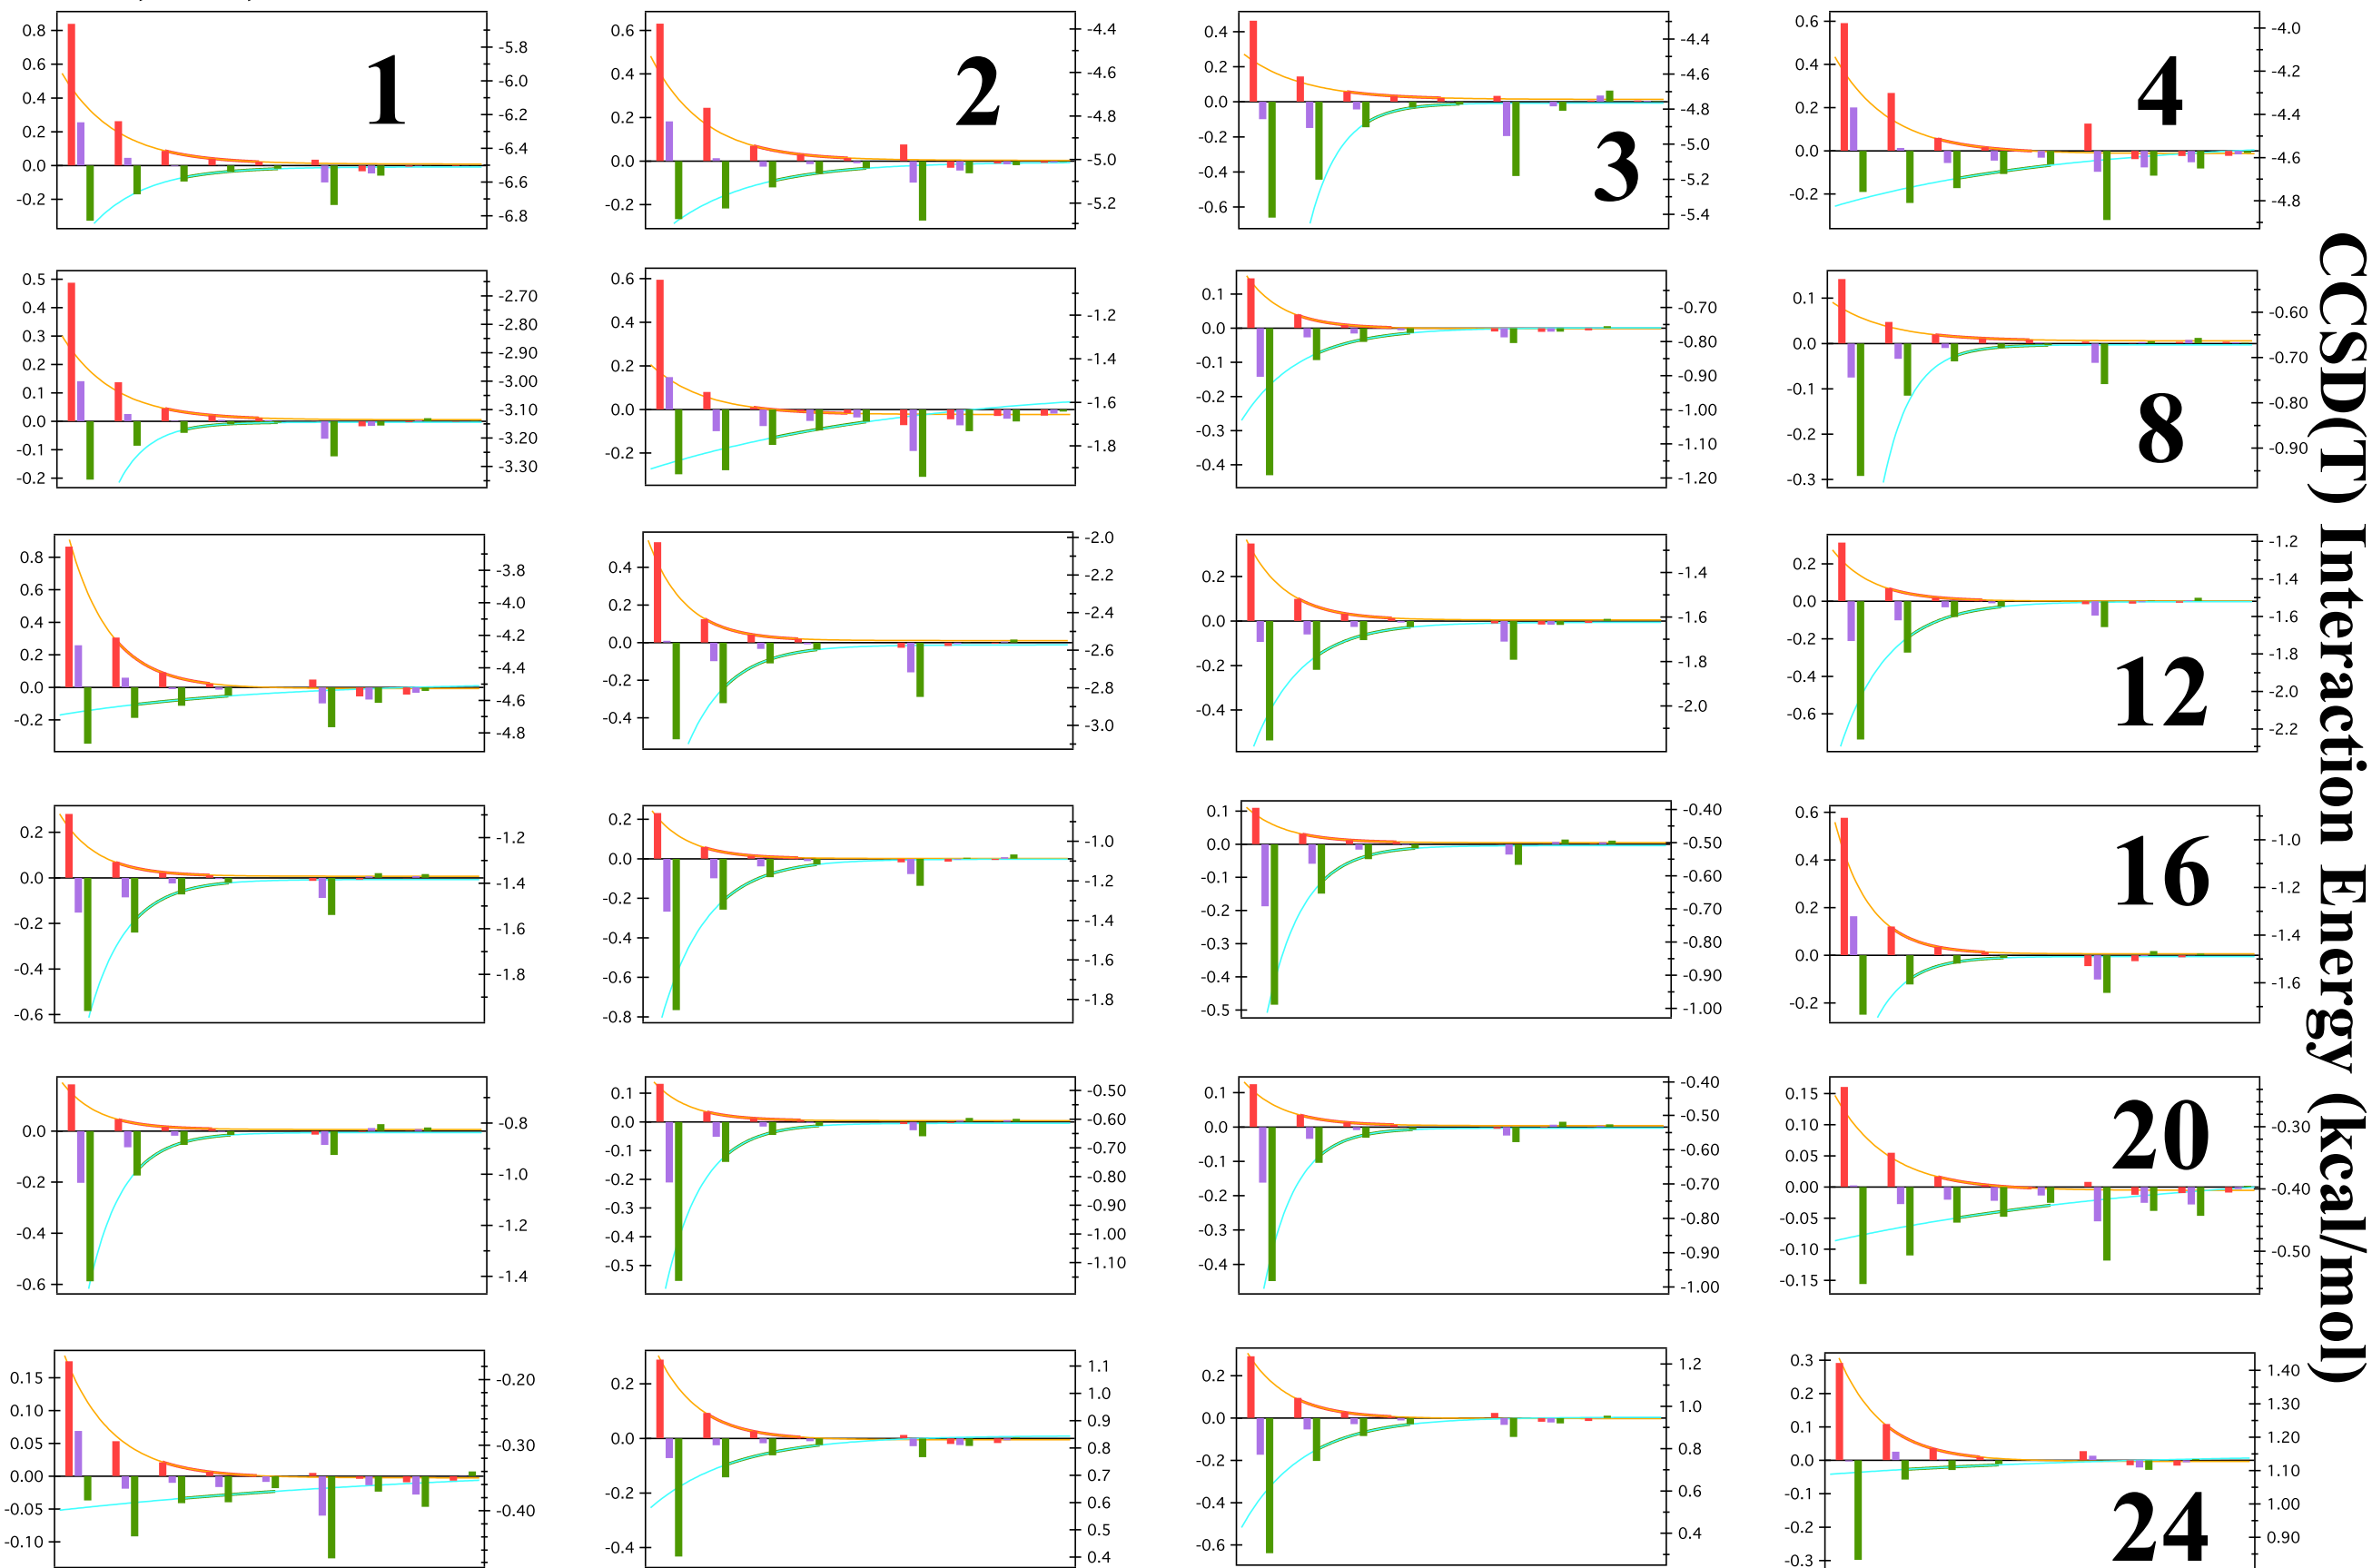

CCSD(T) Interaction Energy (kcal/mol)

(each graph) Basis Set: aDZ, aTZ, aQZ, a5Z, a6Z, aDTZ, aTQZ, aQ5Z, a56Z

# Basis Convergence of MP2/aXZ for A24

CP, Ave, unCP

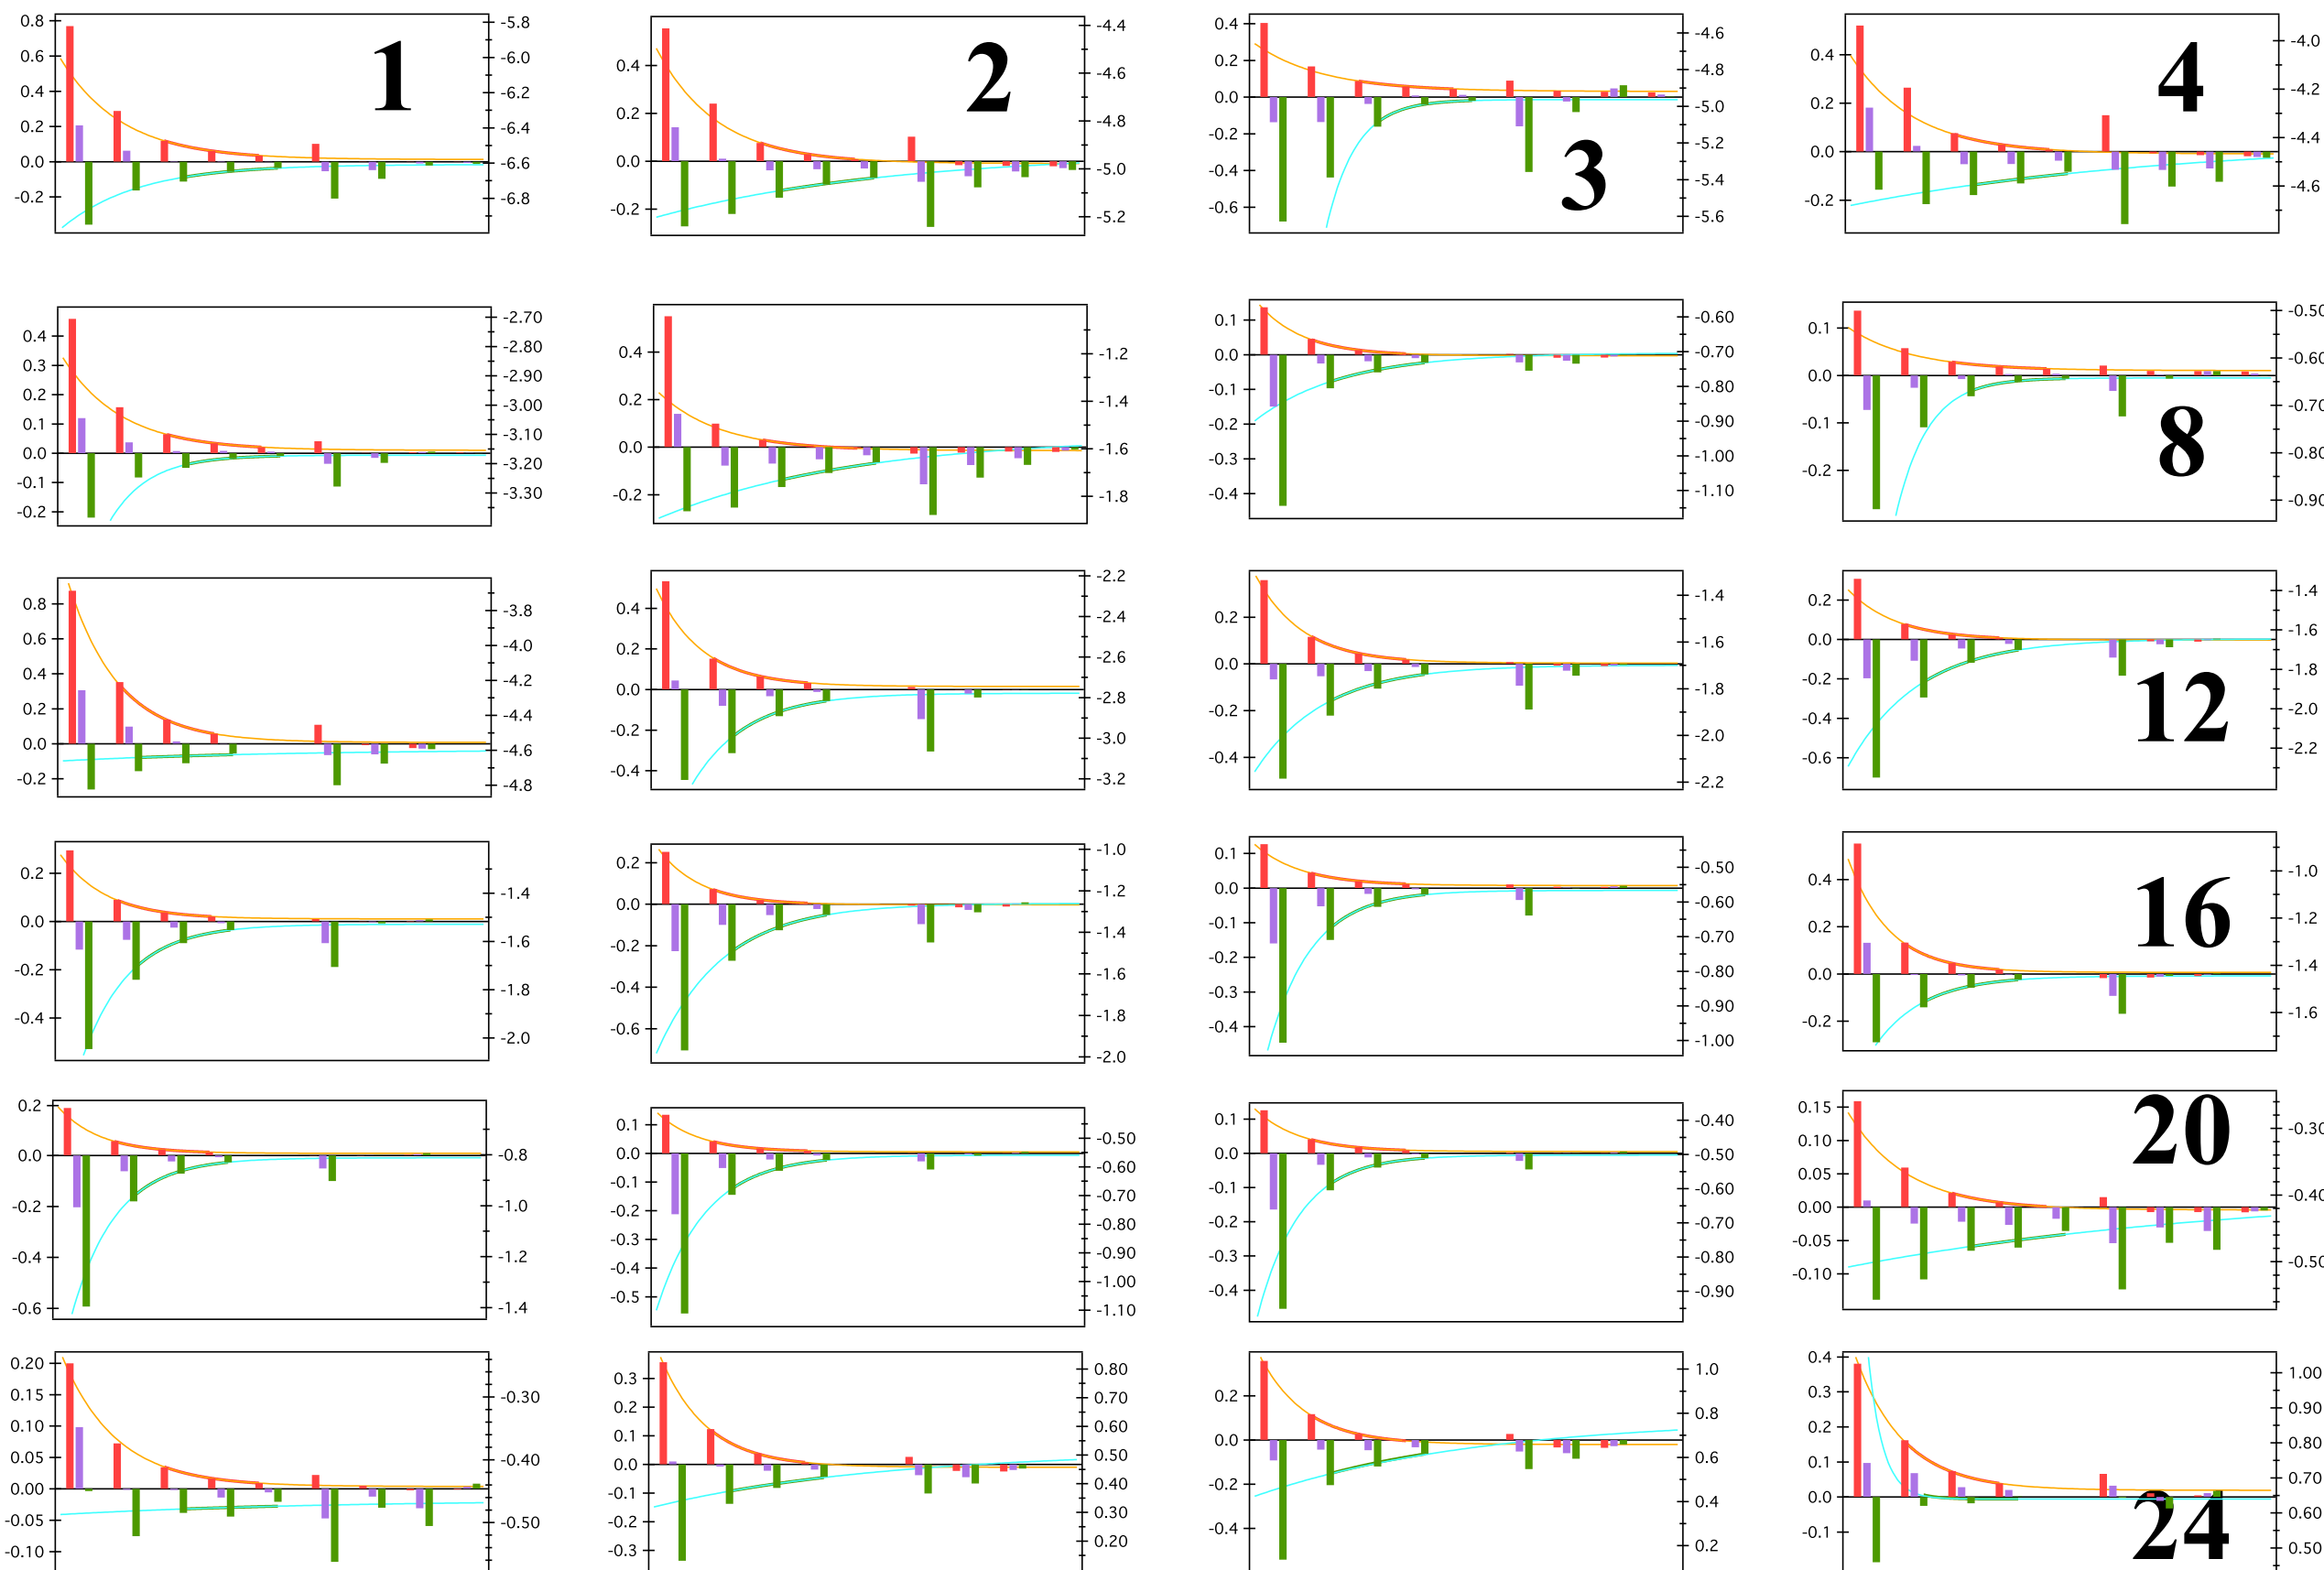

MP2 Interaction Energy (kcal/mol)

(each graph) Basis Set: aDZ, aTZ, aQZ, a5Z, a6Z, aDTZ, aTQZ, aQ5Z, a56Z

# Basis Conv. of Delta Correction $(\text{CCSD(T)-MP2})/\text{aXZ}$ for A24

CP, Ave, unCP

Error in Delta Correction w.r.t. Ref

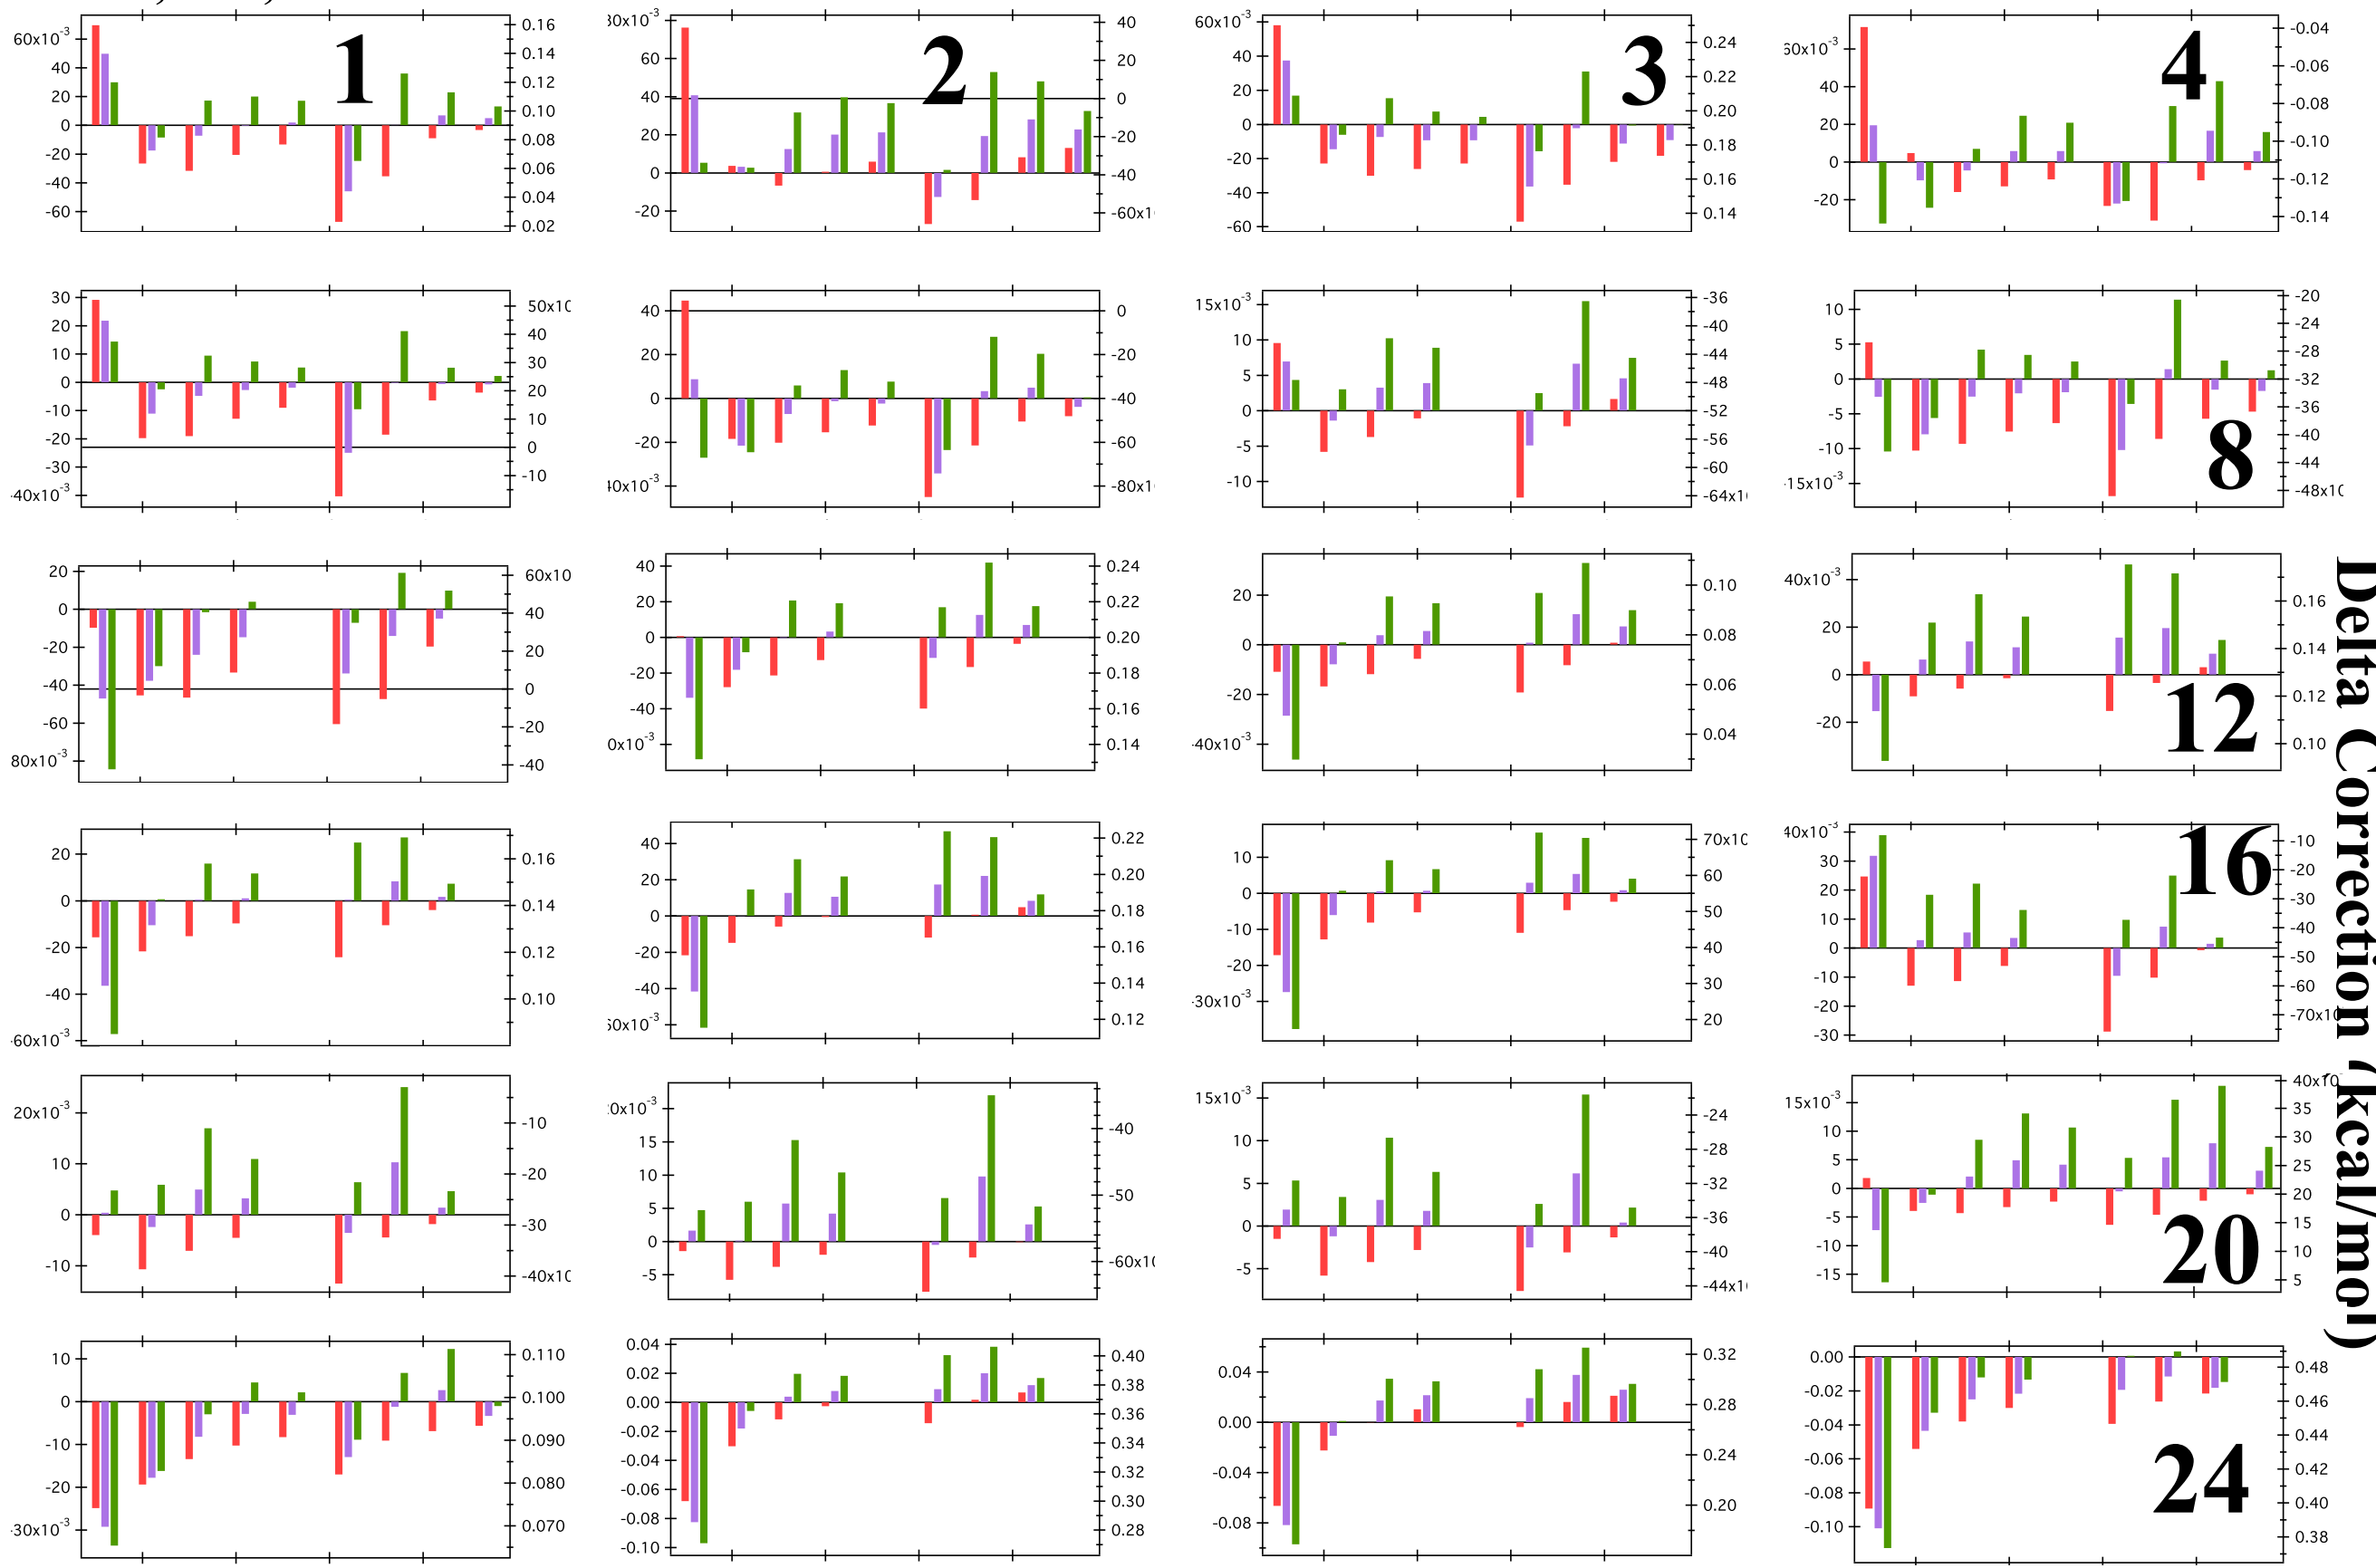

(each graph) Basis Set: aDZ, aTZ, aQZ, a5Z, a6Z, aDTZ, aTQZ, aQ5Z, a56Z

Formic Acid Dimer

Parallel-Disp. Cyanogen Dimer

Sandwich Benzene Dimer

## CCSD(T)/aXZ for Misc.

CP, Ave, unCP

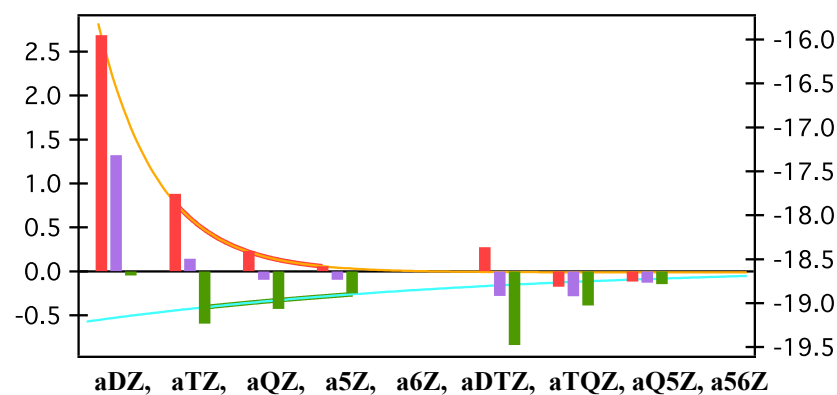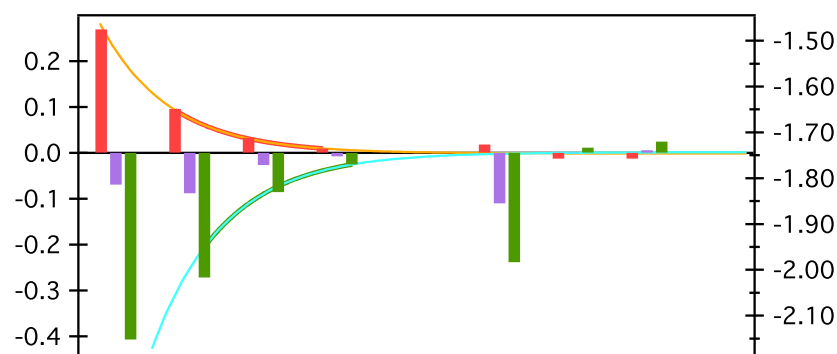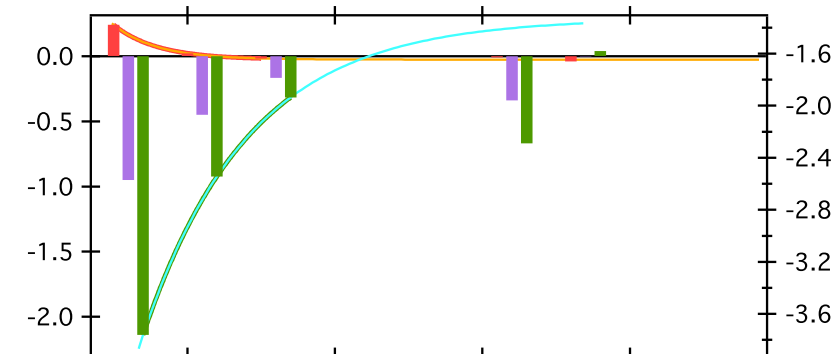

## MP2/aXZ for Misc.

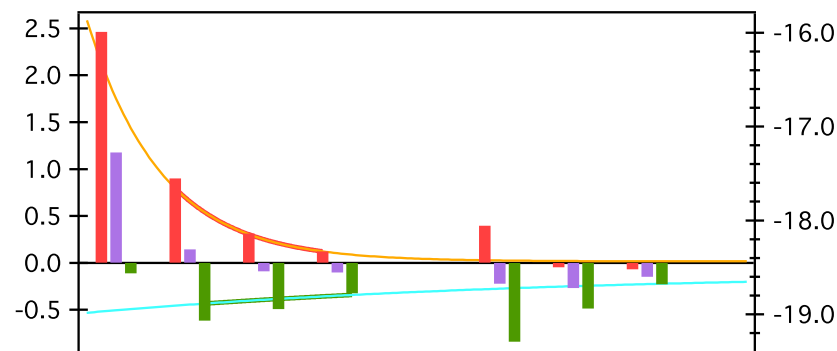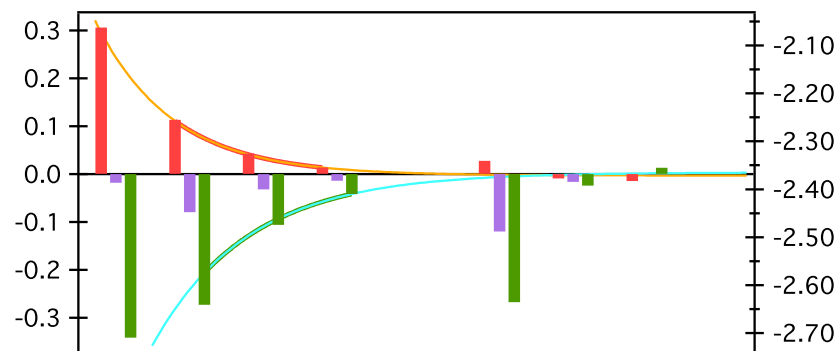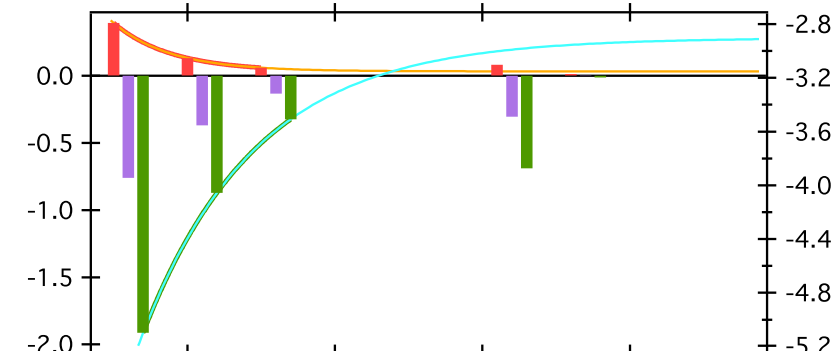

## Delta/aXZ for Misc.

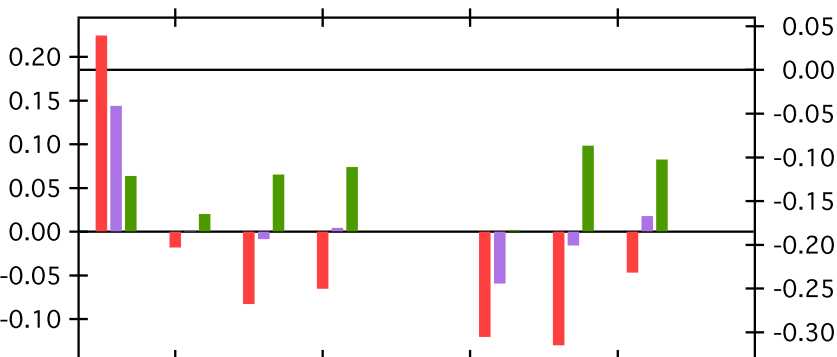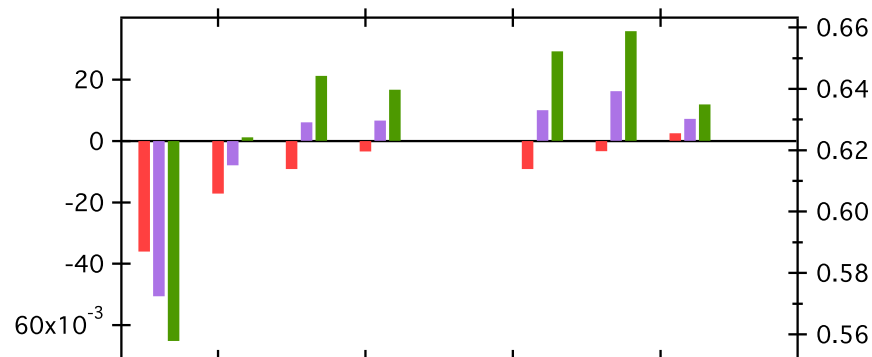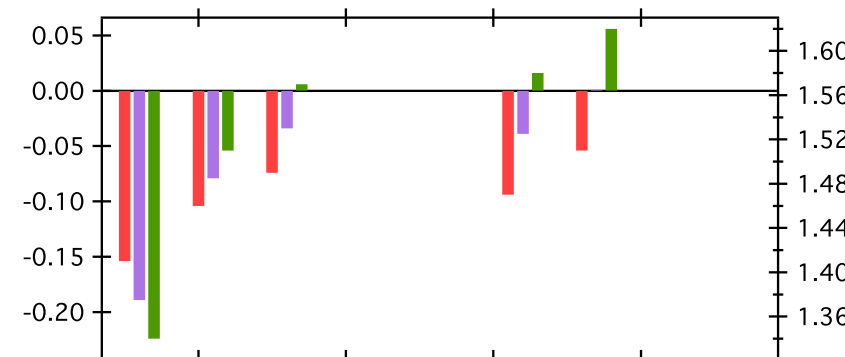

Supplement: Supplementary file 1 [file 3970132]
